# Supplementary material for: Improved efficient perovskite solar cells based on Ta-doped TiO2nanorod arrays
Source: Royal Society of Chemistry journal article supplement (doi:10.1039/c7nr05687g), 2017-01-01
Supplement: c7nr05687g1.pdf [file c7nr05687g1.pdf]

## Supporting Information

### Improved Efficient Perovskite Solar Cells Based on Ta-doped TiO<sub>2</sub> Nanorod Arrays

Qian Cui <sup>a,b</sup>, Xiaochong Zhao <sup>b#</sup>, Hong Lin <sup>c\$</sup>, Longkai Yang <sup>a</sup>, Hong Chen <sup>a</sup>,

Yan Zhang <sup>a</sup>, Xin Li <sup>a\*</sup>

a. Pen-Tung Sah Institute of Micro-Nano Science and Technology, Xiamen University, Xiamen 361005, China

b. Institute of Materials, Chinese Academy of Engineering Physics, Sichuan Jiangyou 621907, China

c. School of Material Science and Engineering, Tsinghua University, Beijing 100084, China

#### Corresponding Authors

E-mail: \* [lixin01@xmu.edu.cn](mailto:lixin01@xmu.edu.cn); # [zhaoxiaochong@caep.cn](mailto:zhaoxiaochong@caep.cn); \$ [hong-lin@tsinghua.edu.cn](mailto:hong-lin@tsinghua.edu.cn)

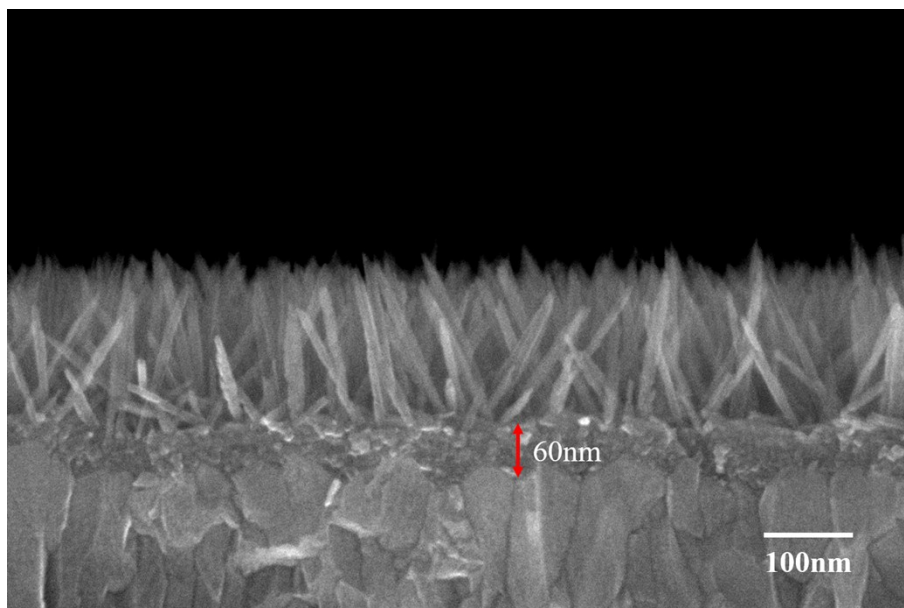

**Figure S1.** Cross section view of a typical undoped TiO<sub>2</sub> NR array film.

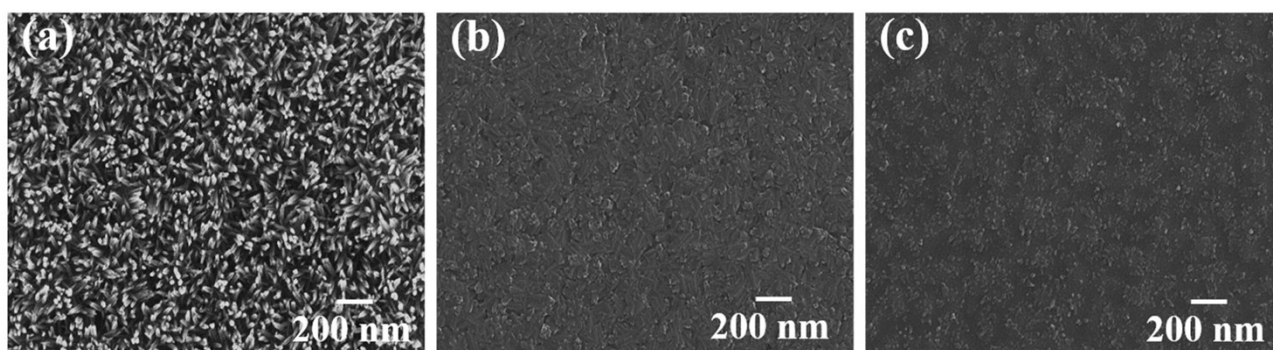

**Figure S2.** Surface view of (a) 0.1 mol%, (b) 0.5 mol%, (c) 1 mol% Ta-doped TiO<sub>2</sub> NR arrays.

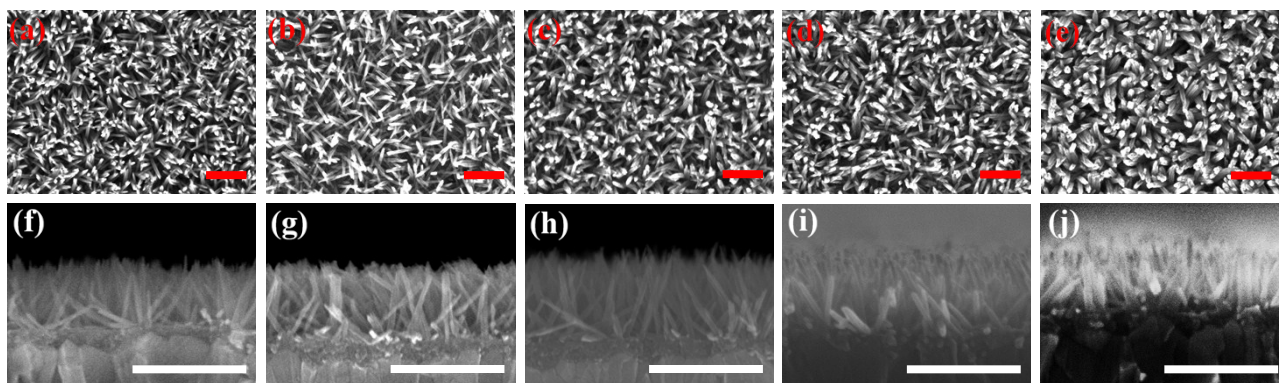

**Figure S3.** SEM images of the top and cross-section views of different TiO<sub>2</sub> NR arrays. (a) undoped, (b) 0.05-Ta, (c) 0.1-Ta, (d) 0.15-Ta, and (e) 0.2-Ta TiO<sub>2</sub> NR arrays. The scale bar is 200 nm.

**Table S1.** The void-space-fractions (VSFs) of the undoped and doped TiO<sub>2</sub> NR array films.

| Sample | 0%-Ta | 0.05%-Ta | 0.1%-Ta | 0.15%-Ta | 0.2%-Ta |
|--------|-------|----------|---------|----------|---------|
| VSF    | 0.682 | 0.683    | 0.683   | 0.684    | 0.686   |

**Table S2.** Lattice parameters of the undoped and doped TiO<sub>2</sub> nanorod arrays.

| Sample | 0-Ta   | 0.05-Ta | 0.1-Ta | 0.15-Ta | 0.2-Ta |
|--------|--------|---------|--------|---------|--------|
| A (nm) | 0.4566 | 0.4566  | 0.4568 | 0.4573  | 0.4575 |
| C (nm) | 0.2948 | 0.2953  | 0.2954 | 0.2955  | 0.2954 |

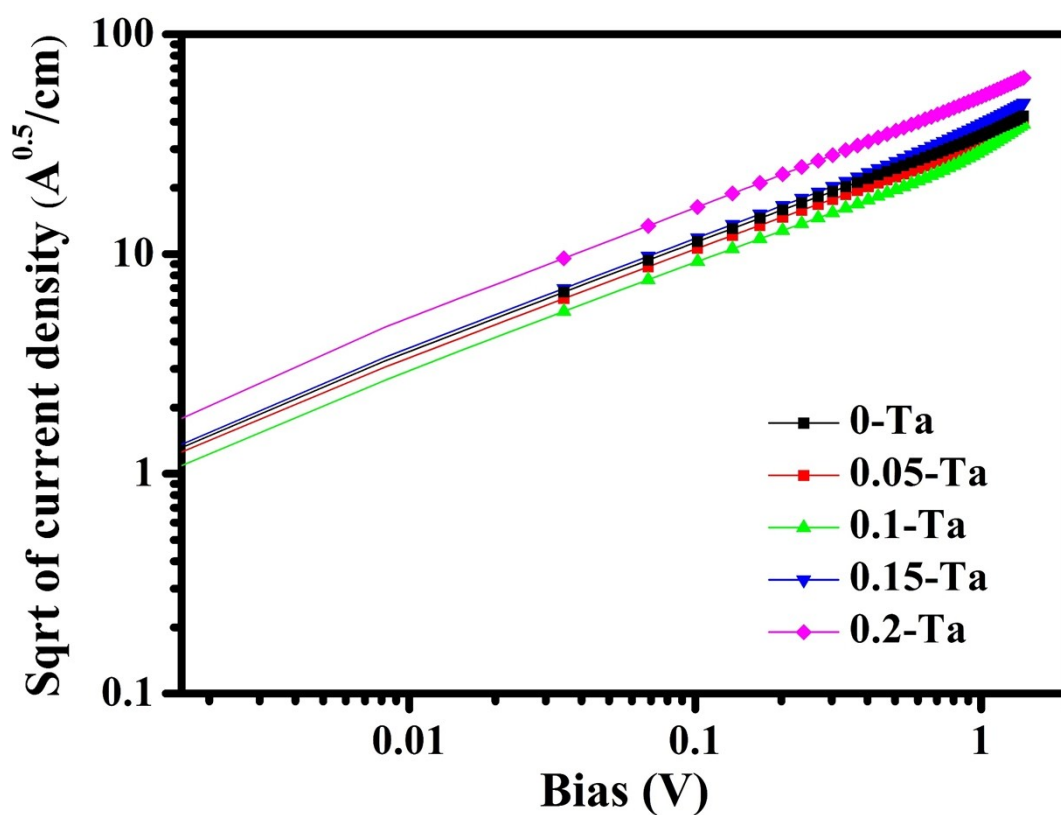

**Figure S4.** Electron mobility of different TiO<sub>2</sub> nanorods measured by space charge limited current (SCLC) method.<sup>1,2</sup> The effective electron mobilities can be calculated as  $1.9 \times 10^{-5}$ ,  $2.11 \times 10^{-5}$ ,  $2.34 \times 10^{-5}$ ,  $3.00 \times 10^{-5}$ , and  $4.33 \times 10^{-5}$  cm<sup>2</sup> V<sup>-1</sup>s<sup>-1</sup> based on the undoped and doped (0.05-Ta, 0.1-Ta, 0.15-Ta, 0.2-Ta) TiO<sub>2</sub> NR arrays.

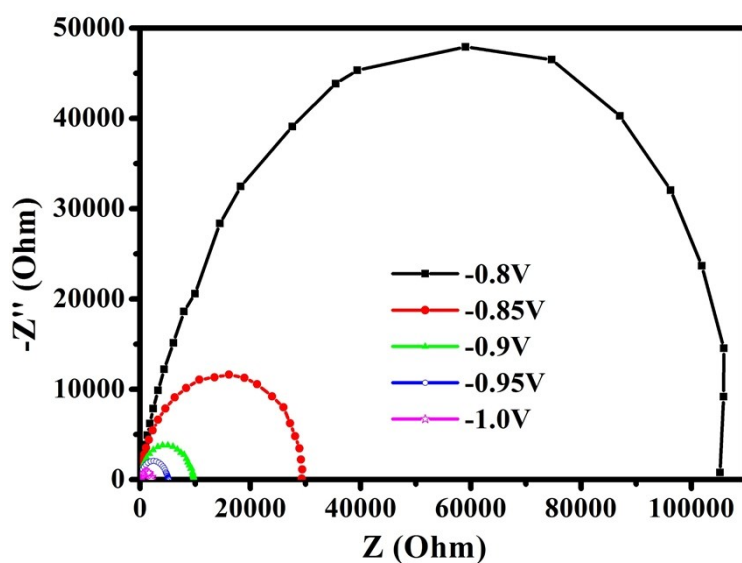

**Figure S5.** Example Nyquist plots of the devices based on 0.1-Ta TiO<sub>2</sub> NR arrays at the bias from -0.8 V to -1.0 V in the dark.

**Table S3.** The serial resistances of the devices based on the undoped and doped TiO<sub>2</sub> NR arrays. The data show the average values based on six devices. The active cell area is 0.16 cm<sup>2</sup>.

| Sample  | -0.8 V ( $\Omega$ ) | -0.85 V ( $\Omega$ ) | -0.9 V ( $\Omega$ ) | -0.95 V ( $\Omega$ ) | -1.0 V ( $\Omega$ ) |
|---------|---------------------|----------------------|---------------------|----------------------|---------------------|
| 0-Ta    | 18 $\pm$ 0.3        | 18 $\pm$ 0.4         | 17.7 $\pm$ 0.2      | 17.5 $\pm$ 0.1       | 17.3 $\pm$ 0.7      |
| 0.05-Ta | 18 $\pm$ 0.3        | 18.4 $\pm$ 0.5       | 18.5 $\pm$ 0.4      | 17.7 $\pm$ 0.4       | 17.5 $\pm$ 0.2      |
| 0.1-Ta  | 17 $\pm$ 0.6        | 18.1 $\pm$ 0.2       | 18.3 $\pm$ 0.3      | 17.7 $\pm$ 0.3       | 17.3 $\pm$ 0.2      |
| 0.15-Ta | 16.8 $\pm$ 0.4      | 17.3 $\pm$ 0.4       | 17.2 $\pm$ 0.3      | 17.1 $\pm$ 0.3       | 17.5 $\pm$ 0.4      |
| 0.2-Ta  | 21 $\pm$ 0.9        | 21.8 $\pm$ 1.1       | 21.4 $\pm$ 0.7      | 21.2 $\pm$ 0.5       | 21 $\pm$ 0.3        |

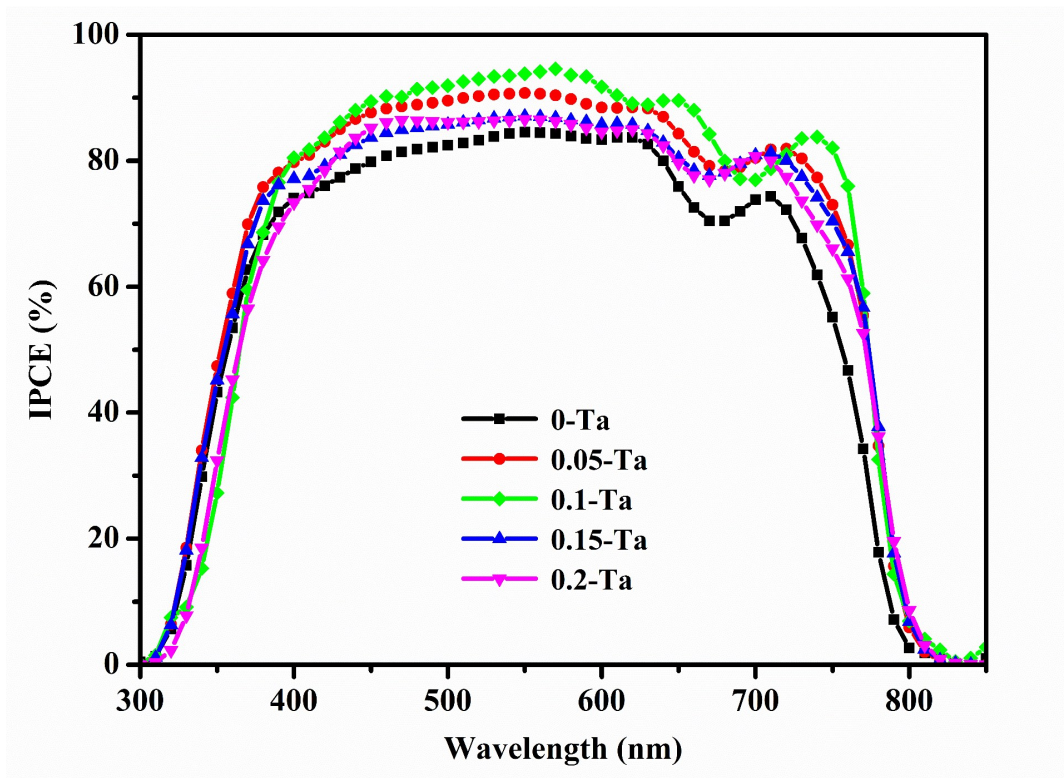

**Figure S6.** The incident photon-to-current efficiency (IPCE) spectra of perovskite solar cells based on undoped and Ta-doped  $\text{TiO}_2$  NR arrays.

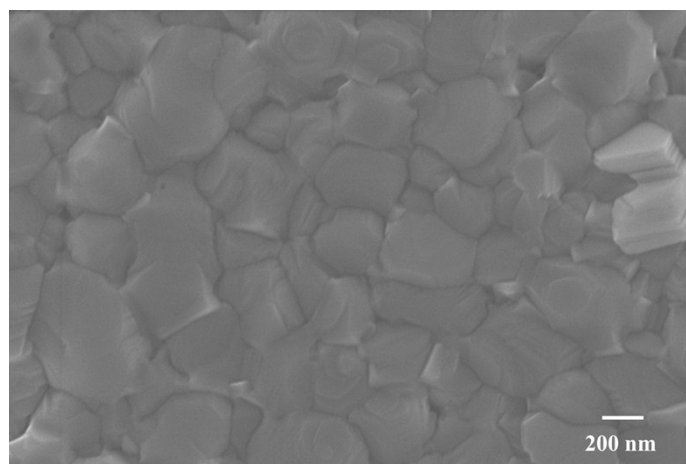

**Figure S7.** SEM image of the top view of the perovskite deposited on the 0.1-Ta  $\text{TiO}_2$  NR array.

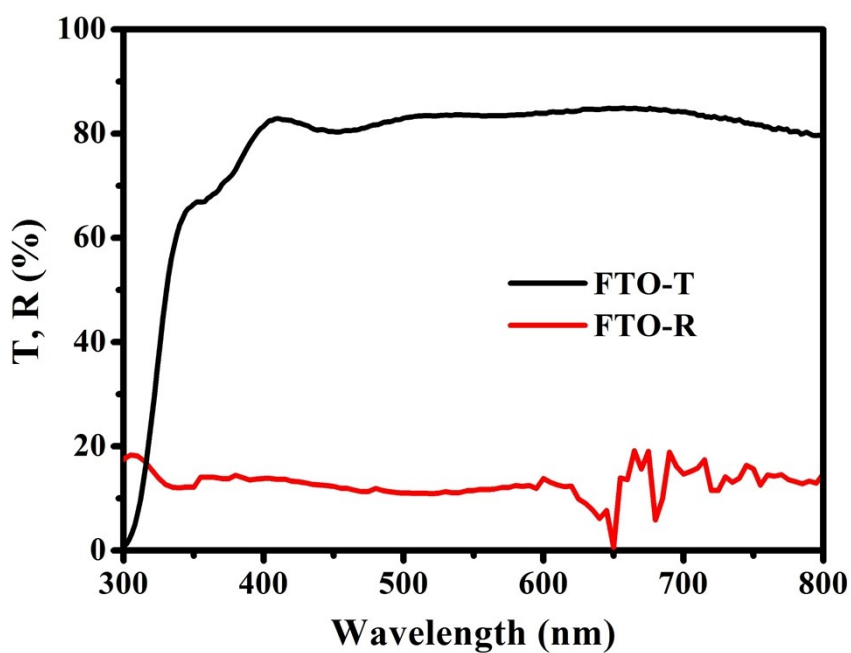

**Figure S8.** Transmission, T, and reflection, R, versus wavelength of the FTO substrate

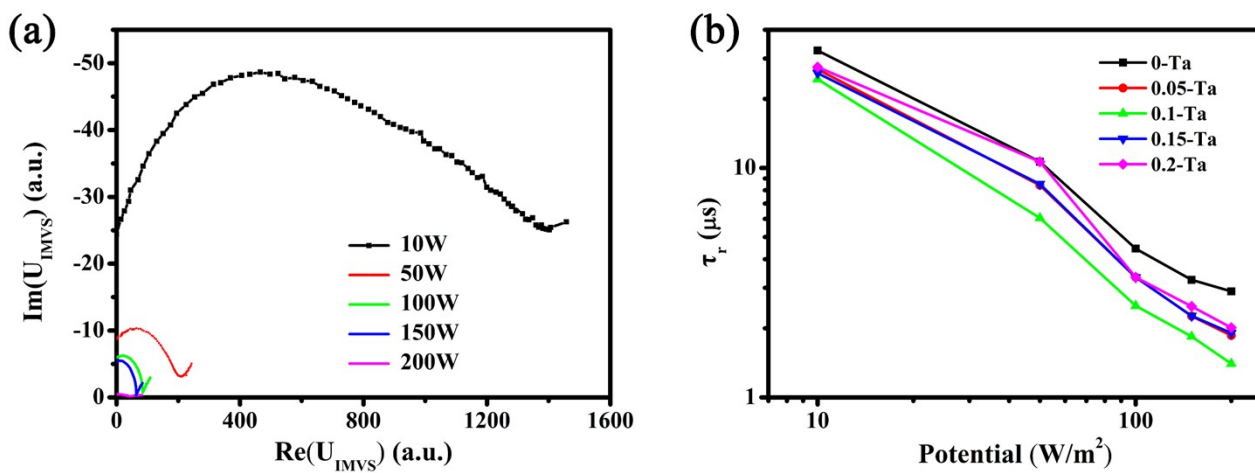

**Figure S9.** (a) Example IMVS plots for the 0.1-Ta device under different bias light intensities; (b)

Intensity dependence of the lifetimes measured by IMVS for the devices based on undoped and doped  $\text{TiO}_2$  NR arrays.



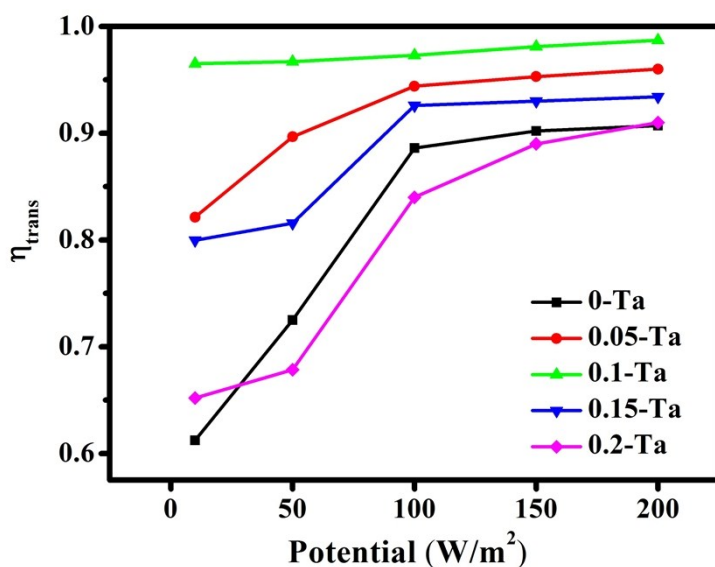

**Figure S10.** Intensity dependence of the collection efficiency measured by IMPS for the devices based on undoped and doped TiO<sub>2</sub> NR arrays.

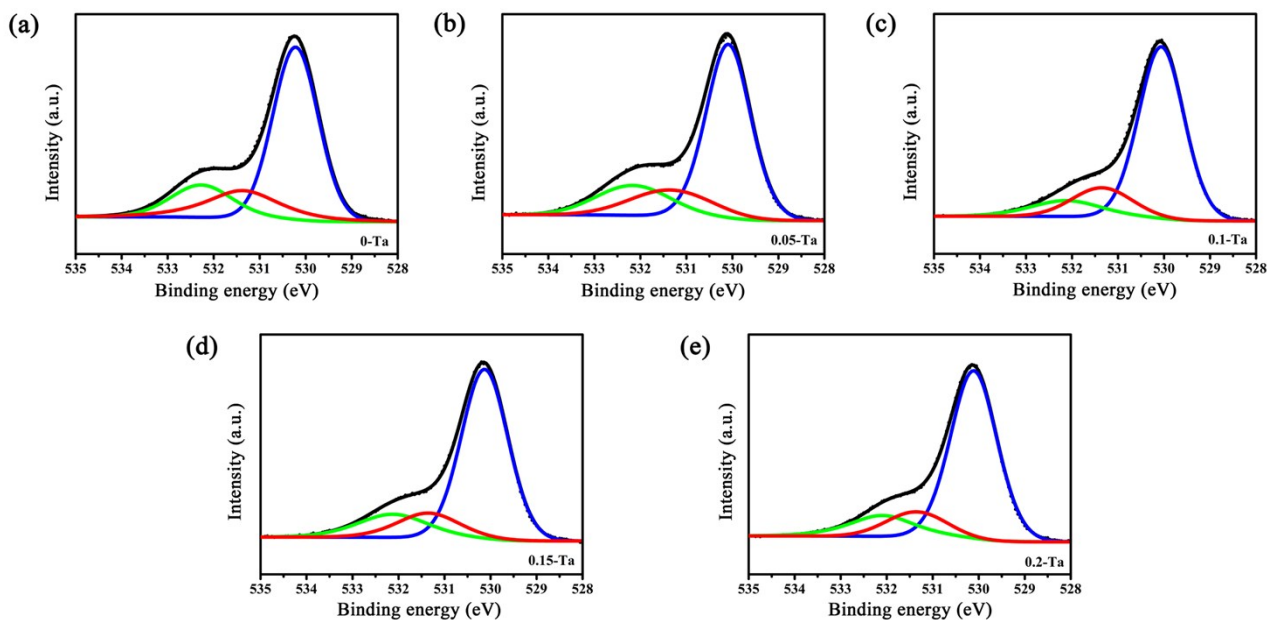

**Figure S11.** High-resolution XPS spectra of O 1s core levels of the TiO<sub>2</sub> nanorods: (a) undoped TiO<sub>2</sub> nanorods, (b) 0.05-Ta TiO<sub>2</sub> nanorods, (c) 0.1-Ta TiO<sub>2</sub> nanorods, (d) 0.15-Ta TiO<sub>2</sub> nanorods, (e) 0.2-Ta TiO<sub>2</sub> nanorods.

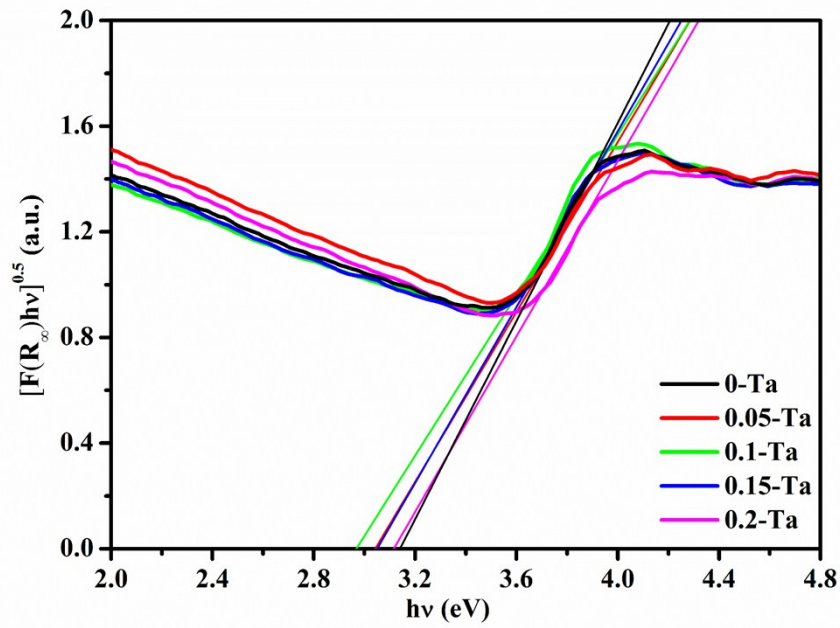

**Figure S12.** UV-vis absorption spectra for the undoped and doped TiO<sub>2</sub> nanorod array films.

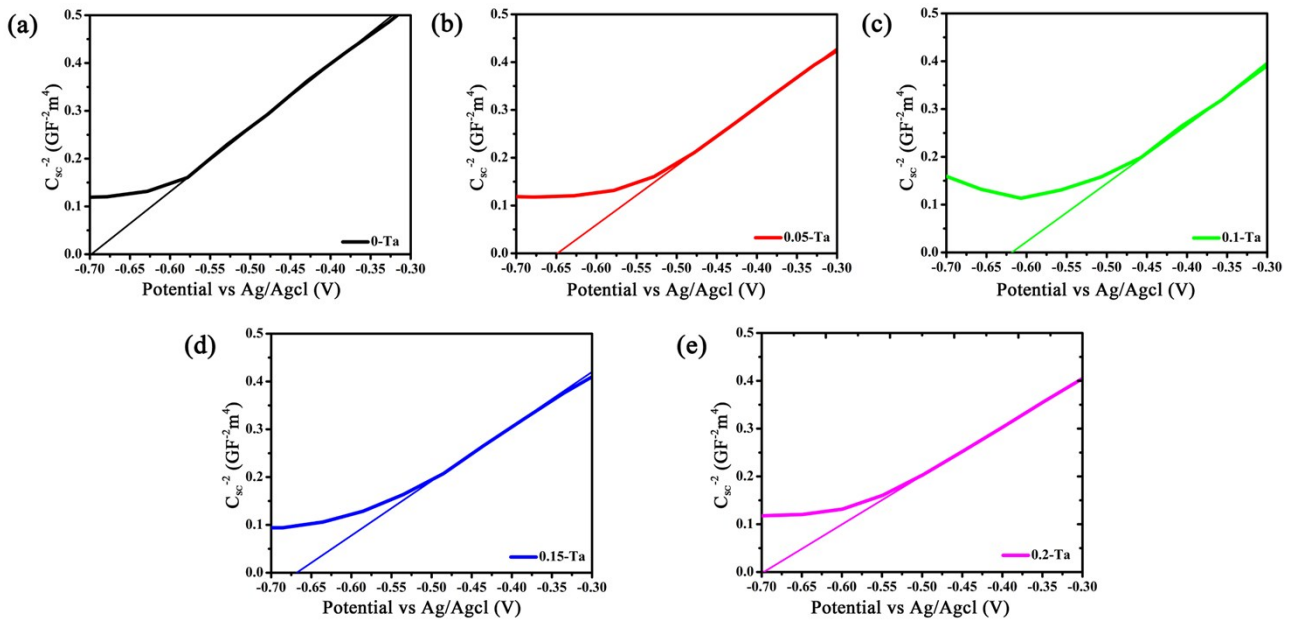

**Figure S13.** Mott-Schottky (M-S) spectra of the TiO<sub>2</sub> nanorods: (a) undoped TiO<sub>2</sub> nanorods, (b) 0.05-Ta TiO<sub>2</sub> nanorods, (c) 0.1-Ta TiO<sub>2</sub> nanorods, (d) 0.15-Ta TiO<sub>2</sub> nanorods, (e) 0.2-Ta TiO<sub>2</sub> nanorods



## References

1. Y. Tu, J. Lin, W. Lin, C. Liu, J. Shyue and W. Su, *Cryst. Eng. Comm.*, 2012, **14**, 4772-4776.
2. A. Mohammadpour, S. Farsinezhad, B. Wiltshire, and K. Shankar, *physica status solidi (RRL)-Rapid Research Letters*, 2014, **8**, 512-516.
